# Supplementary material
Source: ML conference proceedings conference paper supplement (https://openreview.net/forum?id=bBDlTR5eDIX)
Supplement: supplementary_material [file attachment]

Enclosed in the supplementary material are videos generated by our model. They are encoded as mpeg-4 h264 videos. \*\_selected.mp4 videos are selected videos presented in the paper sampled with a temperature of 1.0. \*\_random.mp4 videos show a grid of 9 random samples for a given set of conditioning frames. These were sampled with a temperature of 1.2.

## Attributions:

All videos shown in this paper are licensed under Creative Commons BY 2.0:

<https://creativecommons.org/licenses/by/2.0/>

All videos have been cropped and modified by our algorithm.

Figure 1:

Row 1: “Ocean Beach Surfing” By dakine kane:

<https://www.flickr.com/photos/61112791@N00/8361264621>

Figure 2:

“Ocean Beach Surfing” By dakine kane:

<https://www.flickr.com/photos/61112791@N00/8361264621>

Figure 3:

“Ocean Beach Surfing” By dakine kane:

<https://www.flickr.com/photos/61112791@N00/8361264621>

Figure 4:

Row 1: “Cutting Shrimp” By jencu: <https://www.flickr.com/photos/10581108@N00/3767578041>

Row 2: “How to wrap beef currie pies” By Joy:

<https://www.flickr.com/photos/33993074@N00/3120549283>

Row 3: “Every Saturday in Canada is Hockey night - watching this makes me want to play hockey again!” By Roland Tanglao: <https://www.flickr.com/photos/35034347371@N01/4448745439>

Row 4: “Dan skiing.” By Deana Hunter:

<https://www.flickr.com/photos/87013411@N00/3893217499>

Row 5: "The Cable Car" By Aaron Tait: <https://www.flickr.com/photos/96272984@N00/2442344223>  
Supplementary Material:

1\_selected.mp4, 1\_random.mp4: "Cutting Shrimp" By jencu:

<https://www.flickr.com/photos/10581108@N00/3767578041>

2\_selected.mp4, 2\_random.mp4: "Ashokan Farewell played as a trio" By Bryn Pinzaguer:

<https://www.flickr.com/photos/12394349@N06/4181870078>

3\_selected.mp4, 3\_random.mp4:

"New York City December 2010" By Duncan Currier:

<https://www.flickr.com/photos/26844488@N07/5297091231>

4\_selected.mp4, 4\_random.mp4:

"How to wrap beef currie pies" By Joy: <https://www.flickr.com/photos/33993074@N00/3120549283>

5\_selected.mp4, 5\_random.mp4:

"Every Saturday in Canada is Hockey night - watching this makes me want to play hockey again!"

By Roland Tanglao: <https://www.flickr.com/photos/35034347371@N01/4448745439>

6\_selected.mp4, 6\_random.mp4:

"skiing.0001" By Oleg Borisov: <https://www.flickr.com/photos/35635392@N05/4208147033>

7\_selected.mp4, 7\_random.mp4:

"Ocean Beach Surfing" By dakine kane:

<https://www.flickr.com/photos/61112791@N00/8361264621>

8\_selected.mp4, 8\_random.mp4:

"Jeremy Rocks" By Cheryl Reed: <https://www.flickr.com/photos/67012572@N00/3205082832>

9\_selected.mp4, 9\_random.mp4:

"Mandi Skiing" By Deana Hunter: <https://www.flickr.com/photos/87013411@N00/2740489923>

10\_selected.mp4, 10\_random.mp4:

"Dan skiing." By Deana Hunter:

<https://www.flickr.com/photos/87013411@N00/3893217499>

11\_selected.mp4, 11\_random.mp4:

"The Cable Car" By Aaron Tait: <https://www.flickr.com/photos/96272984@N00/2442344223>

12\_selected.mp4, 12\_random.mp4:

"dave skiing 2" By Leigh Blackall: <https://www.flickr.com/photos/97283472@N00/3072947082>
